# Supplementary material for: Pan-cancer drivers of metastasis
Source: PubMed Central journal article supplement (PMC11697158; doi:10.1186/s12943-024-02182-w), 2025-01-02

A

Lung Cancer Archetypal Analysis

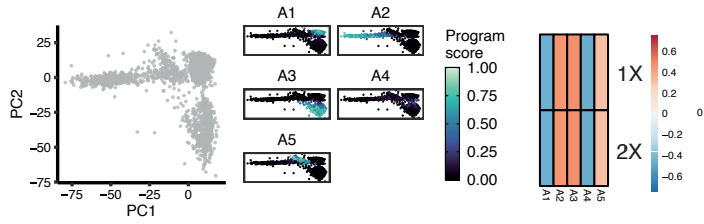

Breast Cancer Archetypal Analysis

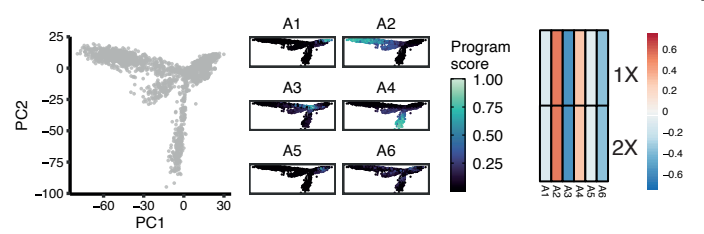

B

286 Metastatic Gene List Biological Processes

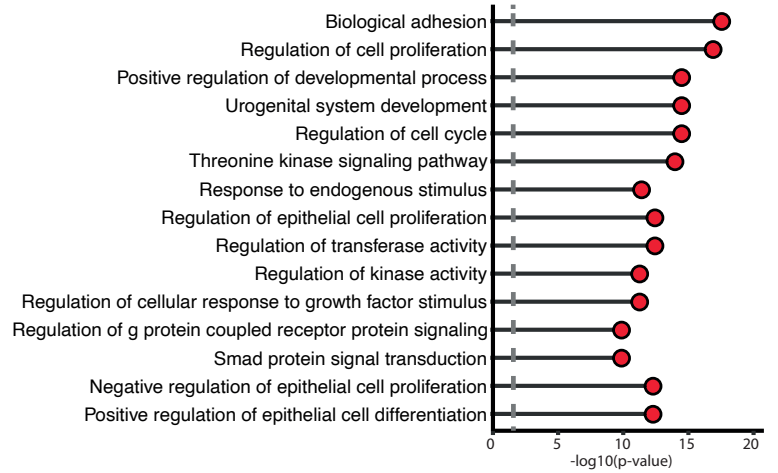

C

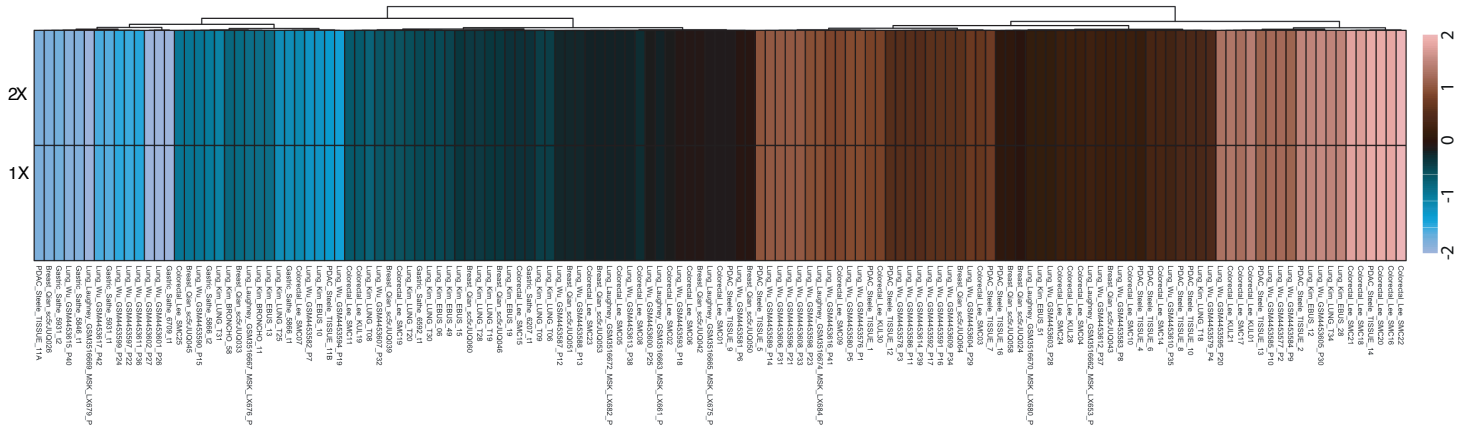

D

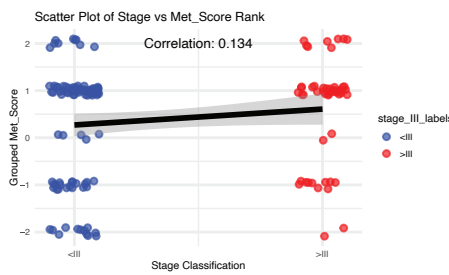

E

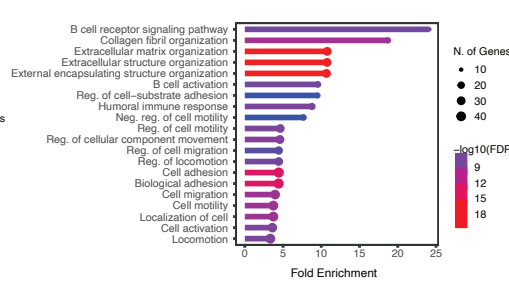

F

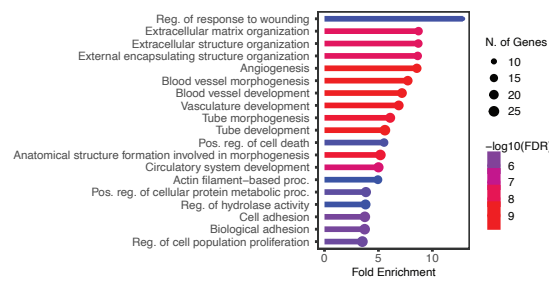

G

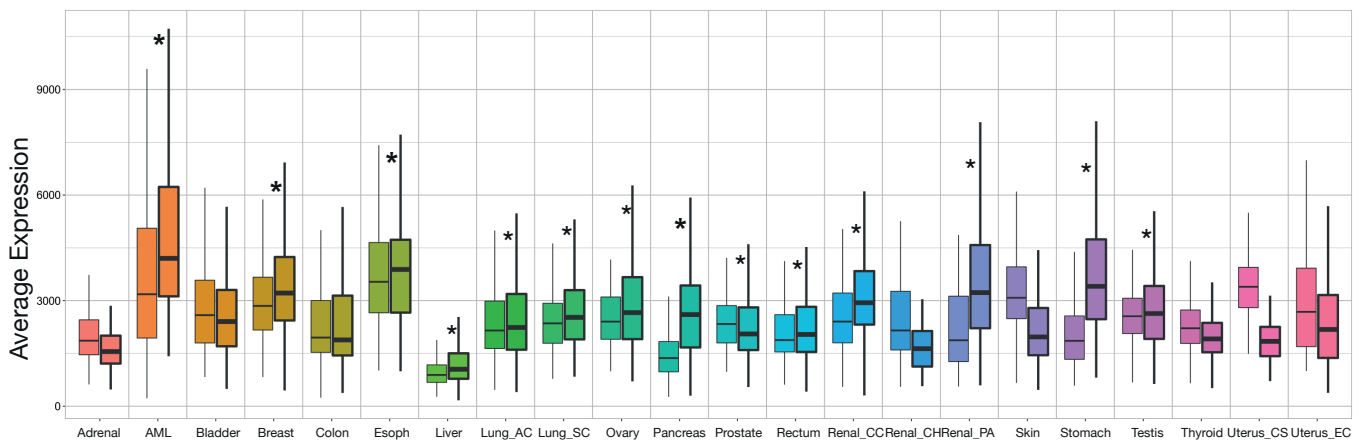

A

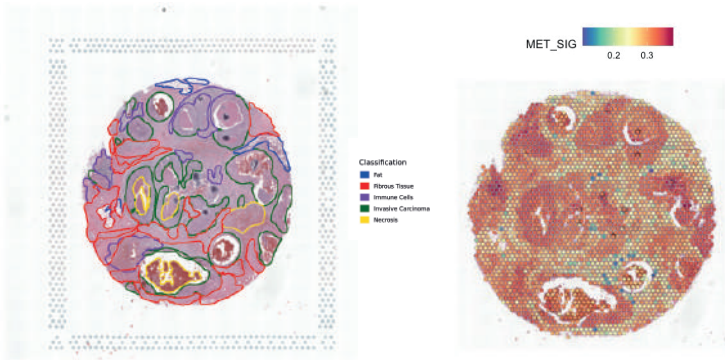

B

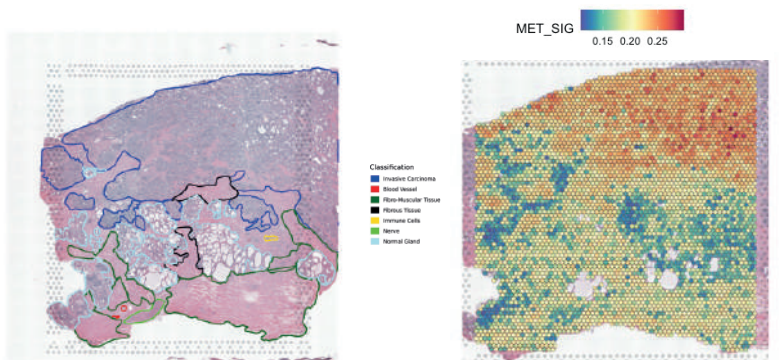

C

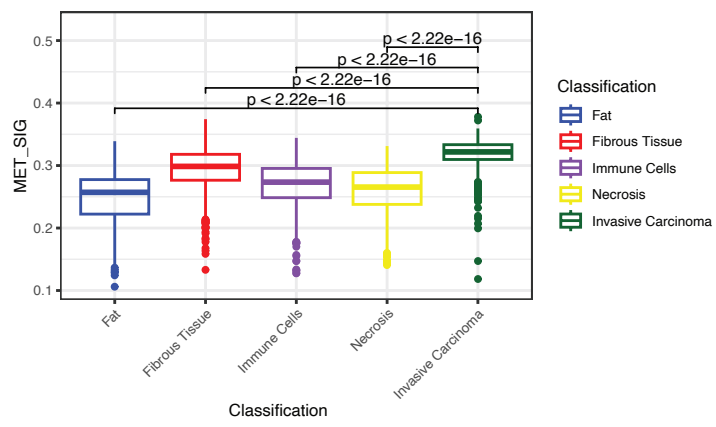

D

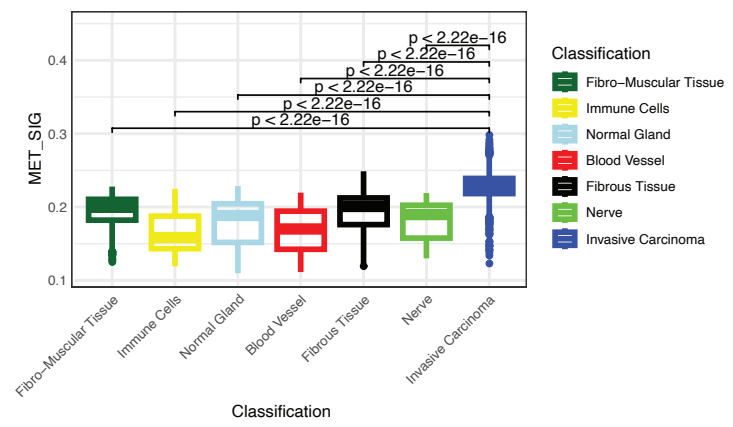

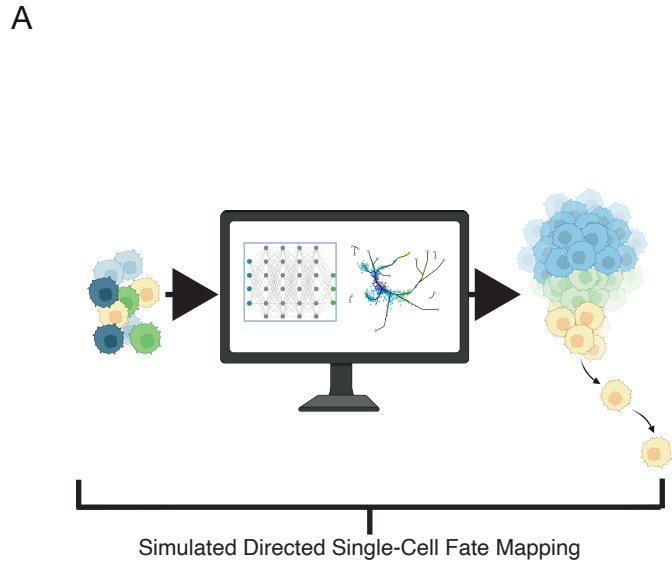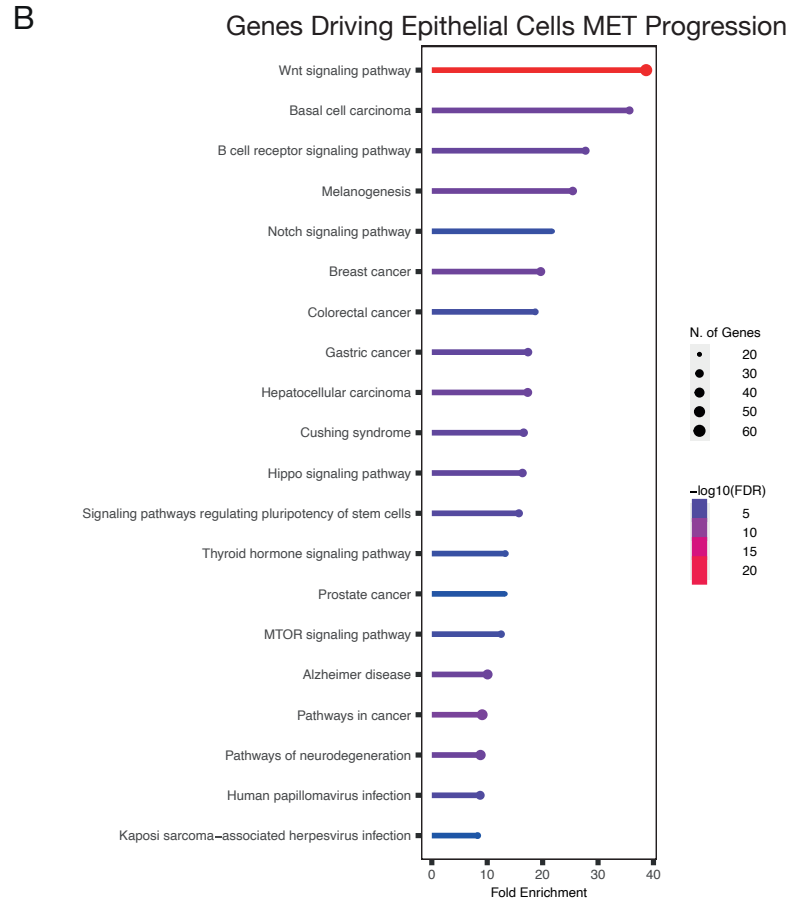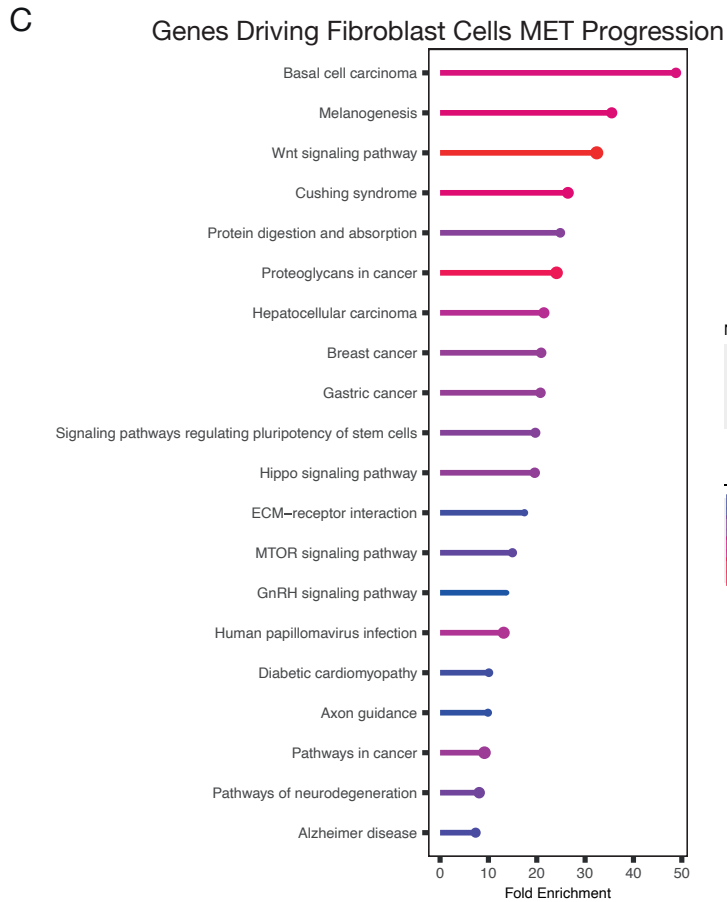

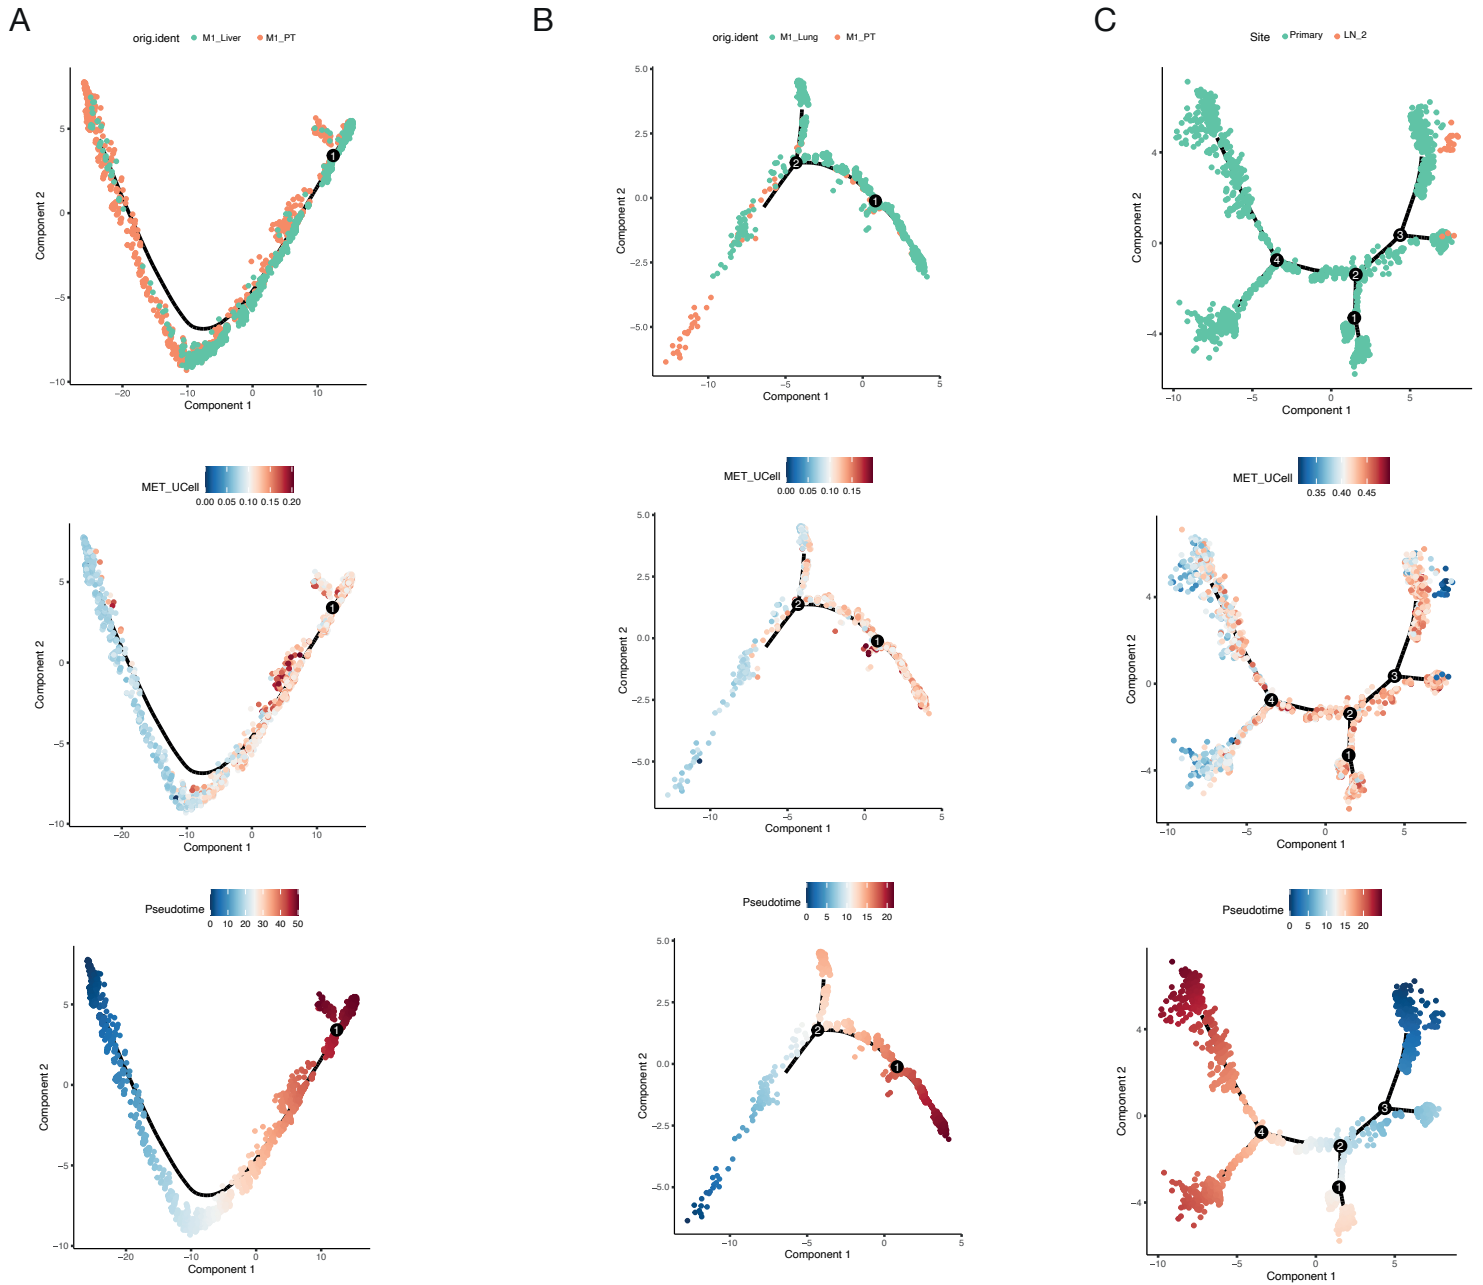

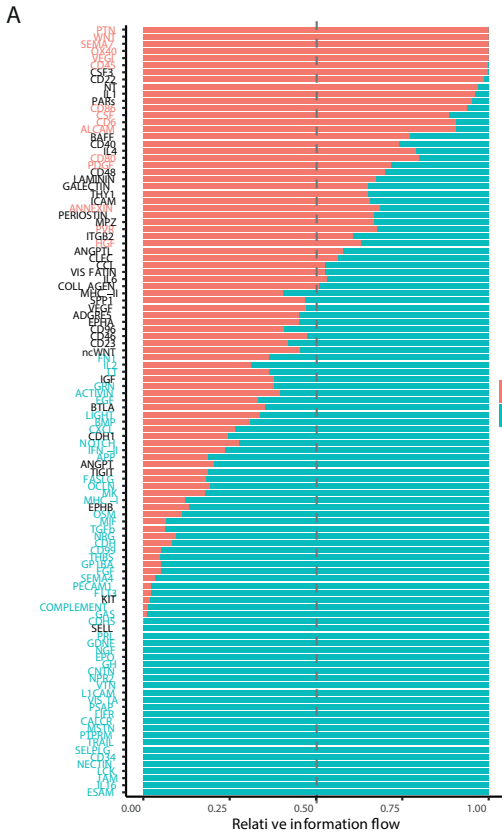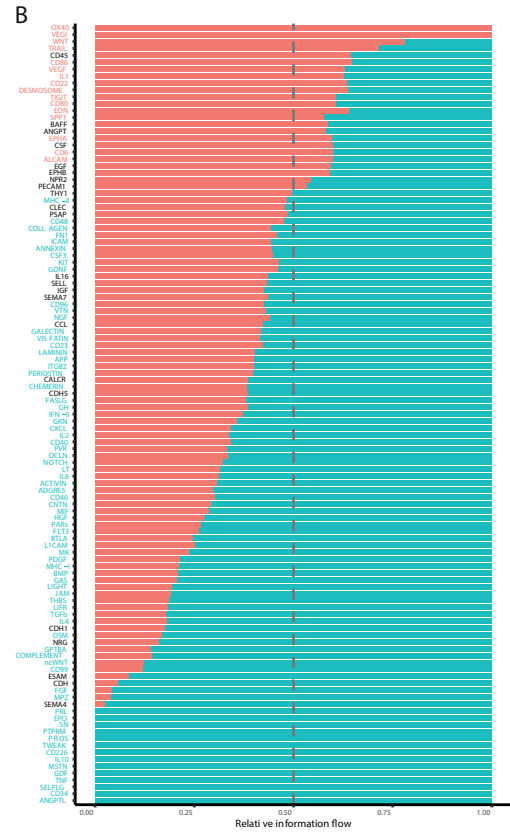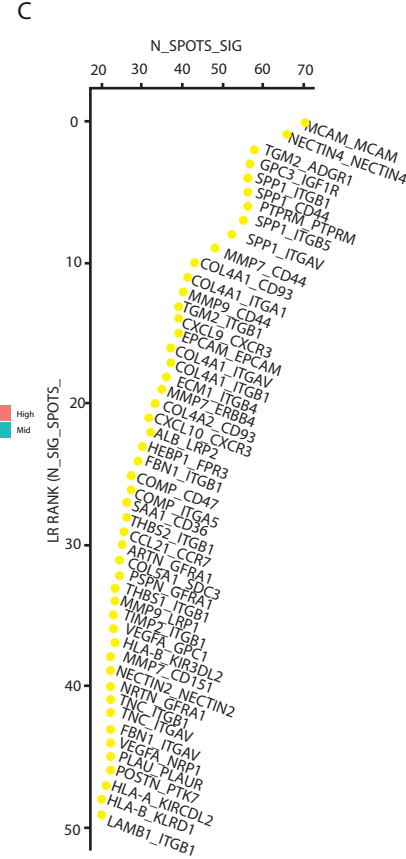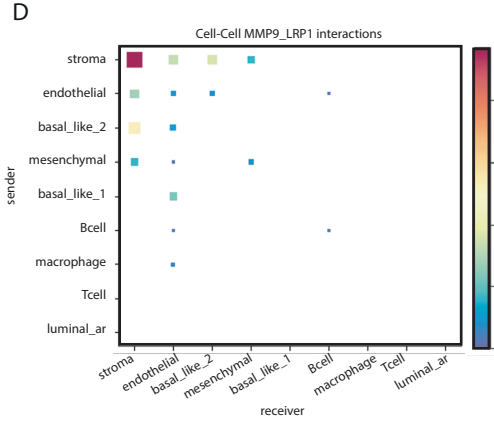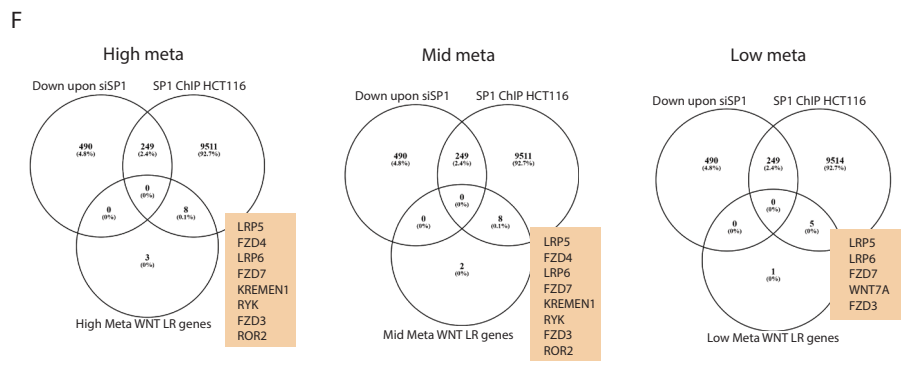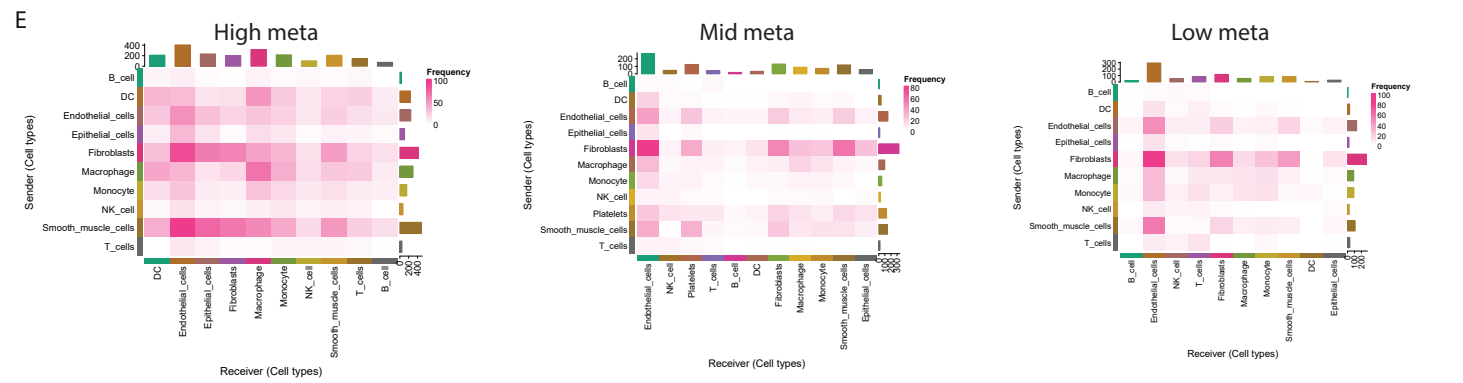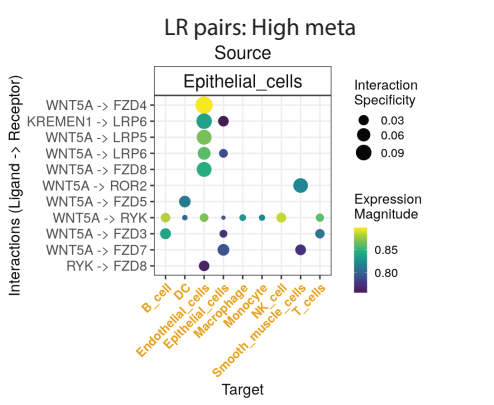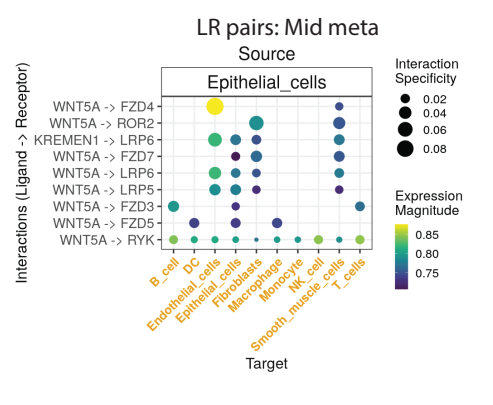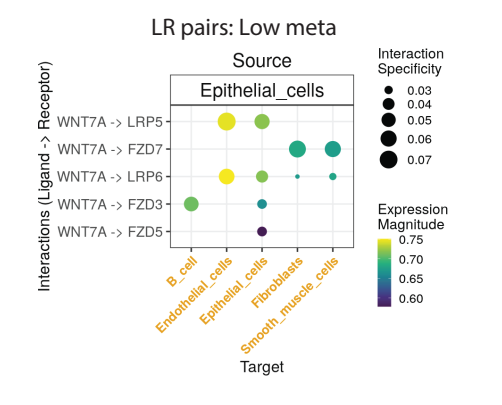

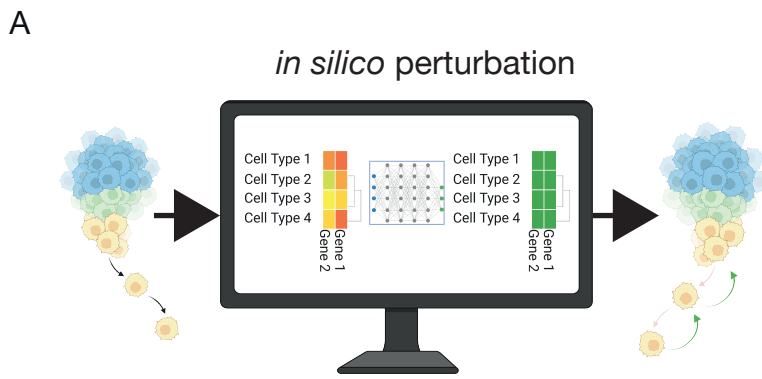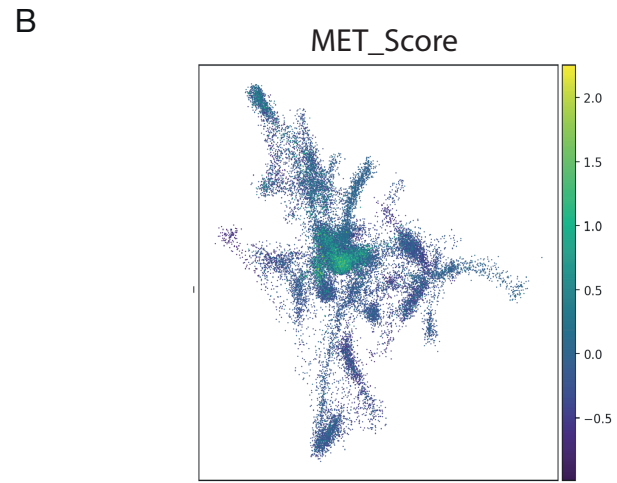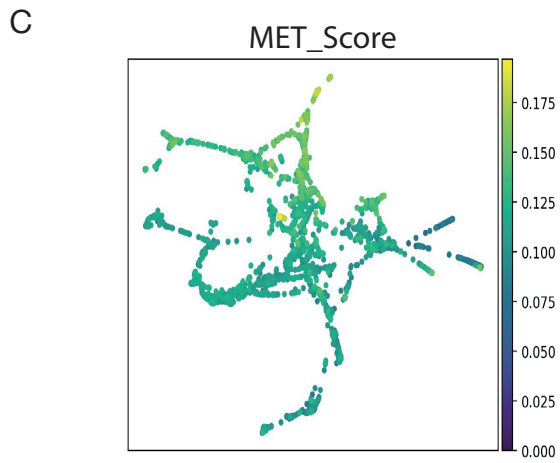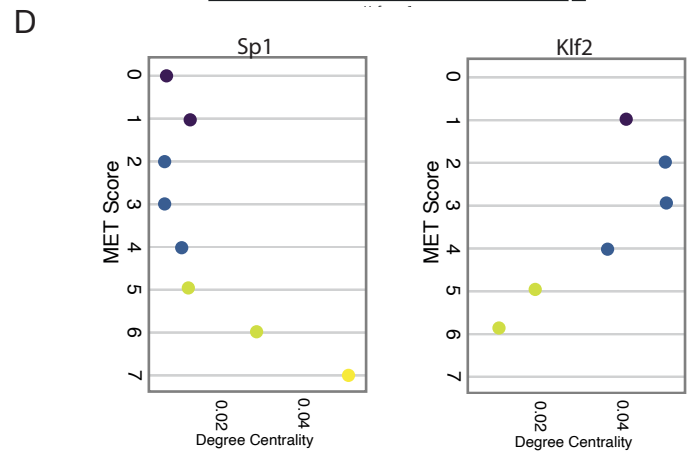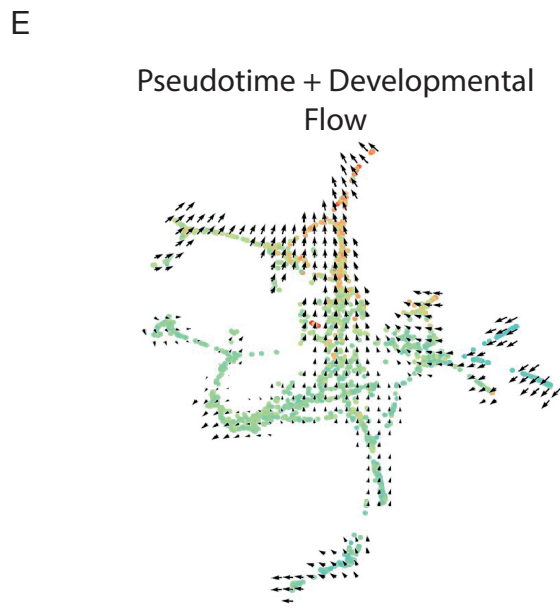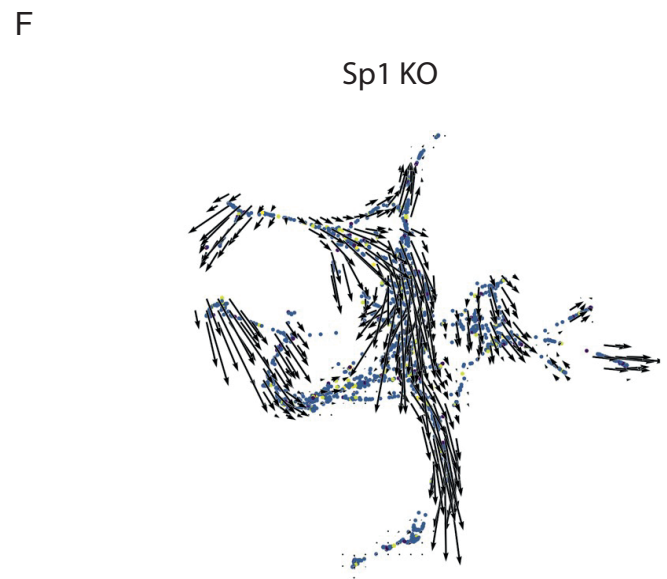

A

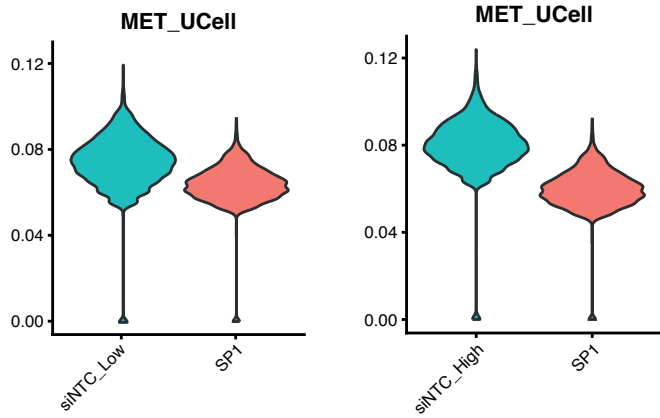

B

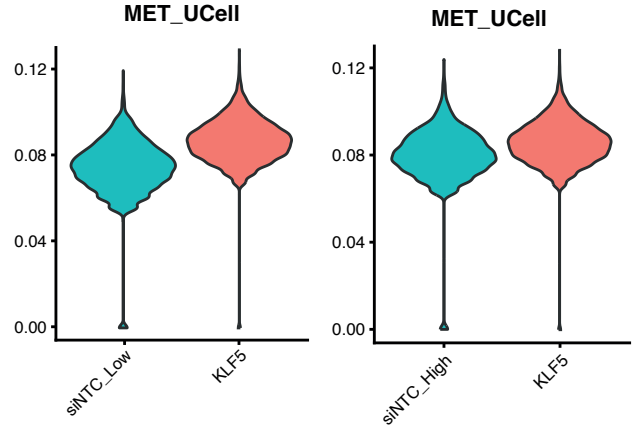

C

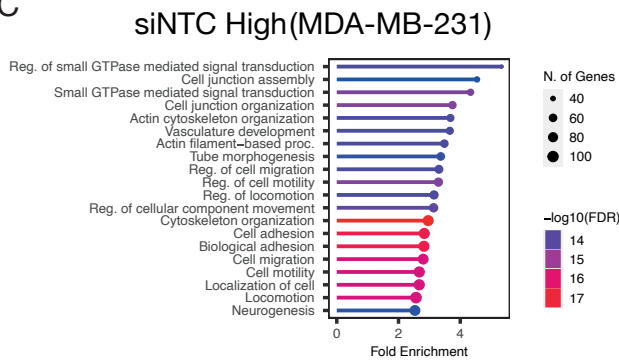

D

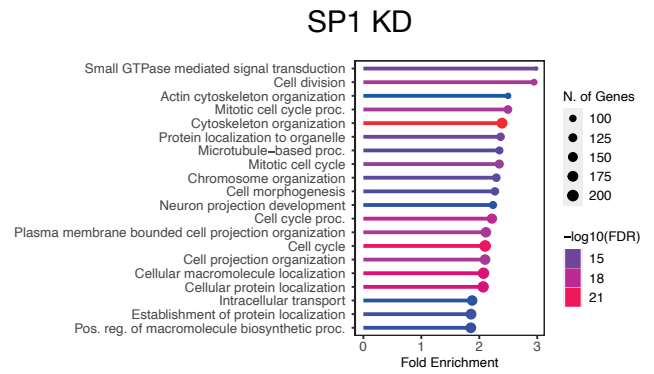

E

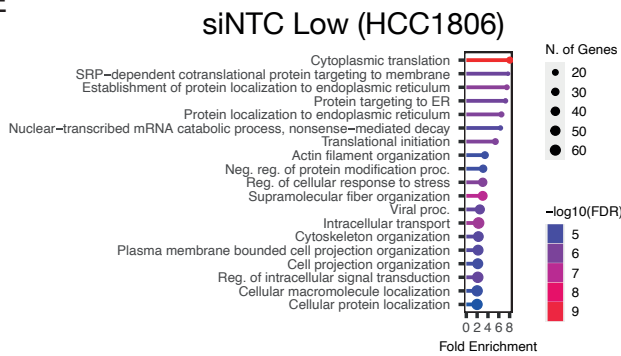

F

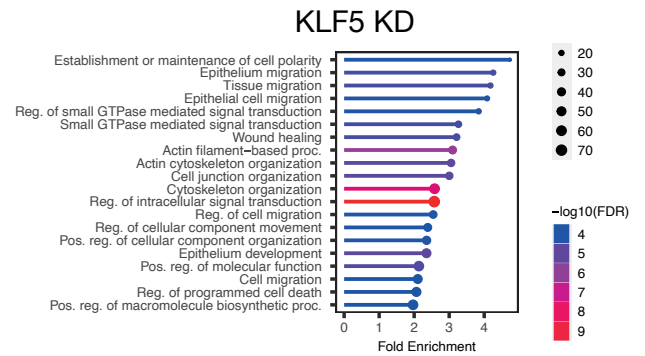

Supplementary Figure S8

**A** qPCR HCC1806 SP1 overexpression

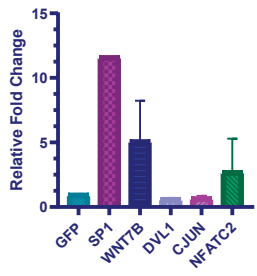

**B** MDA-MB-231-in vivo model

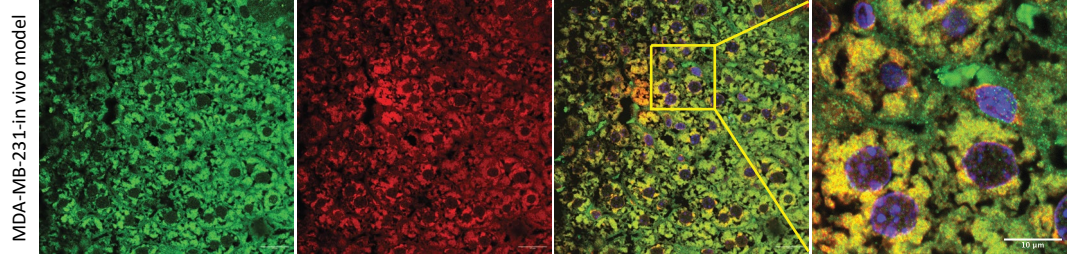

**C** MDA-MB-231 siNTC siSP1

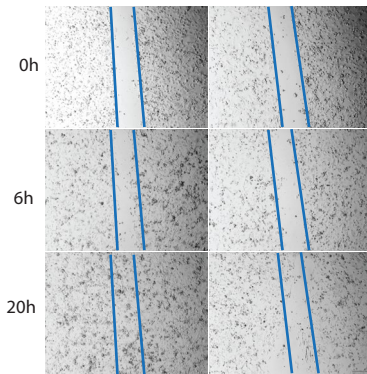

**E** HCC1806 GFP only GFP-SP1

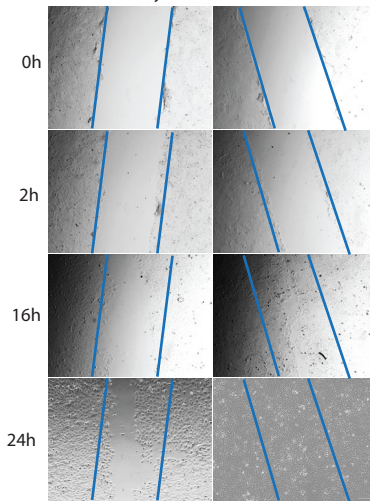

**G** MDAMB231

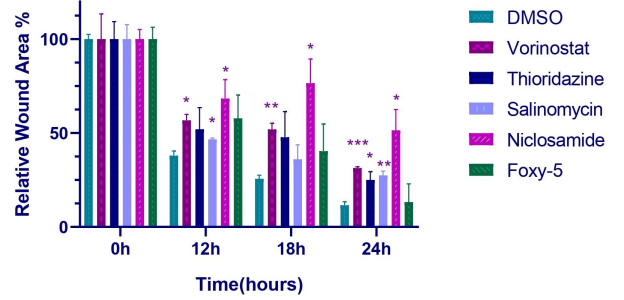

**D** Wound Healing - SP1 Knockdown

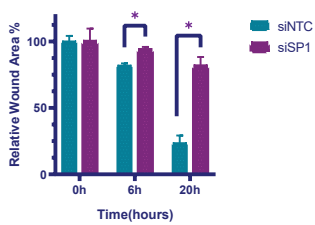

**F** Wound Healing - SP1 Overexpression

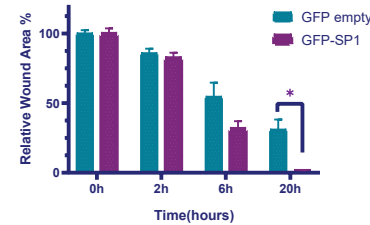

**I** Crystal violet staining quantification

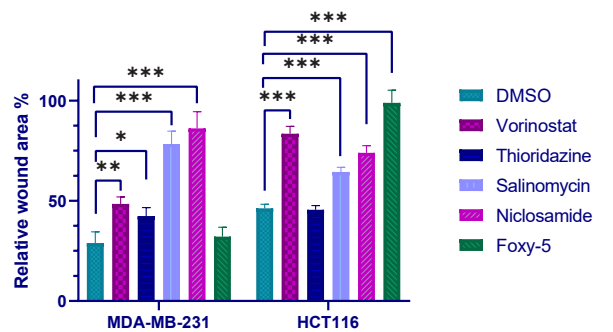

**H** Crystal violet staining

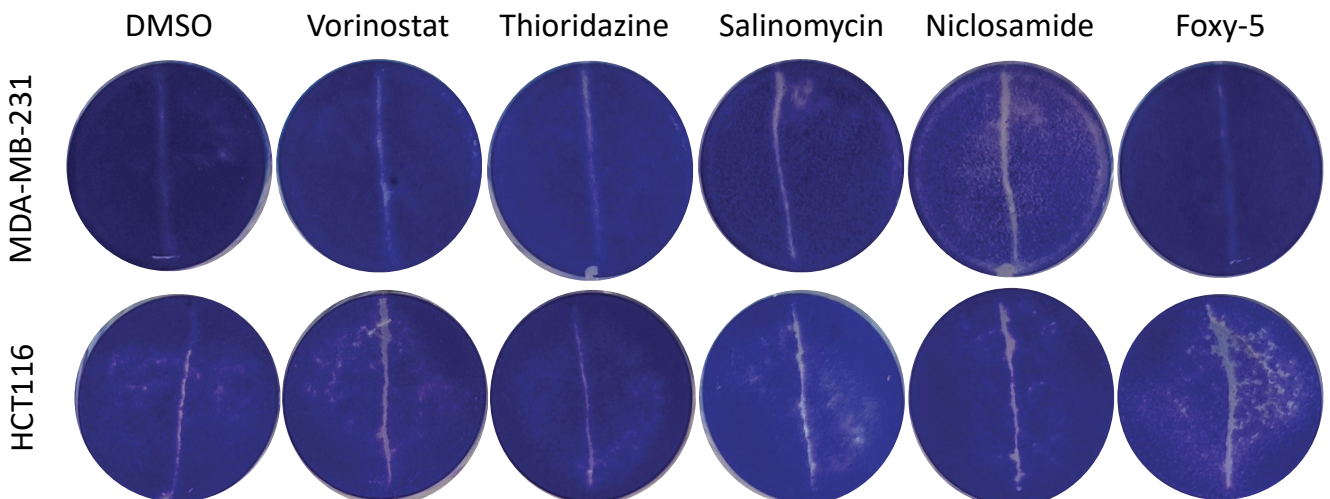

Supplement: 12943_2024_2182_MOESM1_ESM.pdf [file 12943_2024_2182_MOESM1_ESM.pdf]
